# Supplementary material
Source: PubMed Central journal article supplement (PMC6813006)
Supplement: JCM.01269-19-s0001.pdf [file JCM.01269-19-s0001.pdf]

Figure S1. MIC distribution data for this study. Stock isolate MIC data represents n=1 test per isolate, whereas challenge isolate MIC data represents n=3 tests (one at each laboratory) per isolate. MIC values represent reference MICs, which were calculated from the average of two rBMD results.

### *Acinetobacter* sp. rBMD MIC Distribution

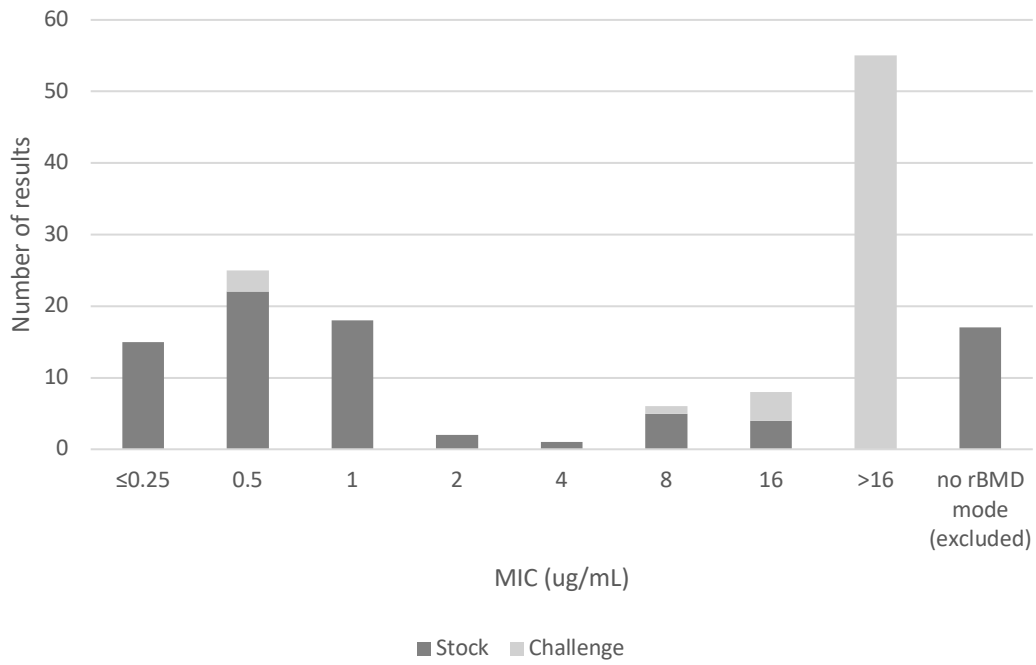

### *Enterobacterales* rBMD MIC Distribution

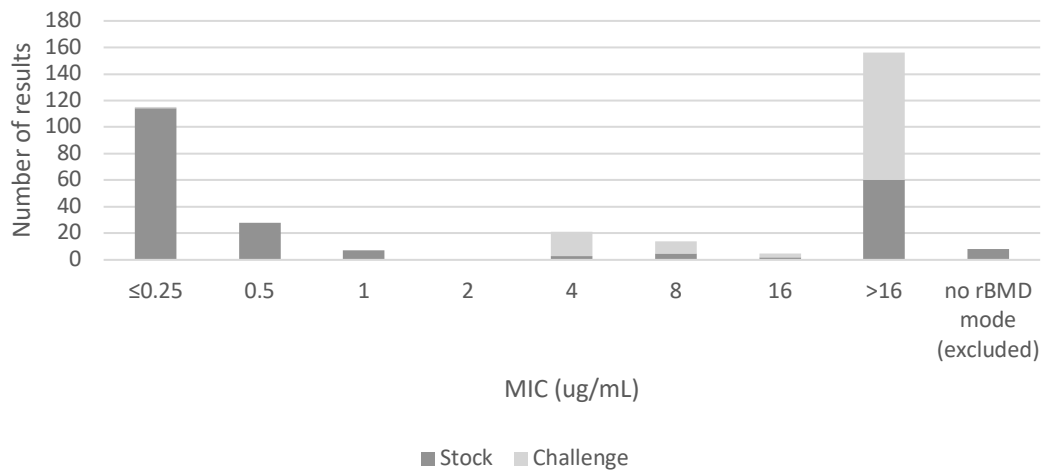

### *P. aeruginosa* rBMD MIC Distribution

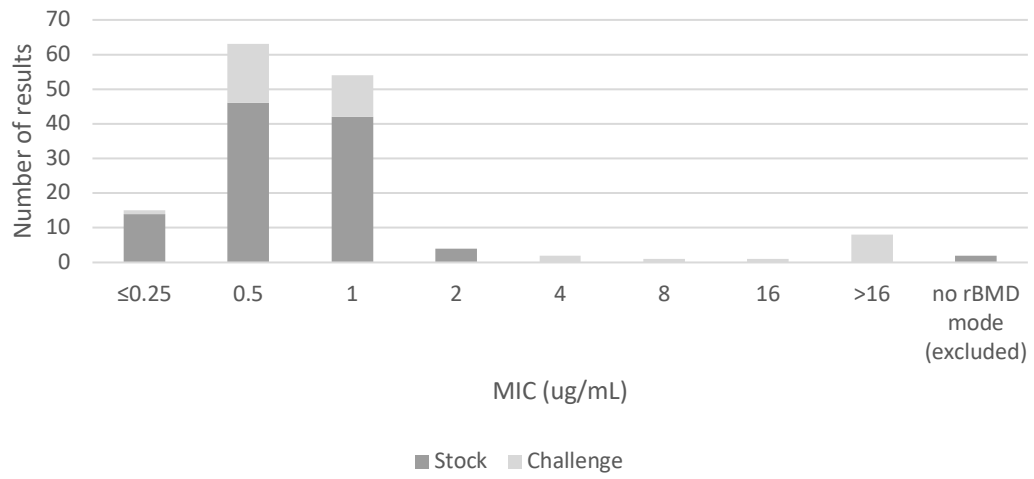

Table S1. Summary of Errors

CBDE Method

| Organism                 | Challenge or Stock | rBMD ( $\mu\text{g}/\text{mL}$ ) | CBDE ( $\mu\text{g}/\text{mL}$ ) | Error Type |
|--------------------------|--------------------|----------------------------------|----------------------------------|------------|
| <i>Acinetobacter</i> sp. | Stock              | 16                               | $\leq 0.4$                       | VME        |
| <i>Acinetobacter</i> sp. | Stock              | 8                                | 1                                | VME        |
| <i>Acinetobacter</i> sp. | Stock              | 8                                | $\leq 0.4$                       | VME        |
| <i>Acinetobacter</i> sp. | Stock              | 8                                | 2                                | VME        |
| <i>Escherichia coli</i>  | Challenge          | 8                                | 2                                | VME        |
| <i>Escherichia coli</i>  | Challenge          | 4                                | 2                                | VME        |
| <i>Escherichia coli</i>  | Challenge          | 4                                | 2                                | VME        |
| <i>Escherichia coli</i>  | Challenge          | 4                                | 2                                | VME        |
| <i>Escherichia coli</i>  | Challenge          | 4                                | 2                                | VME        |
| <i>P. aeruginosa</i>     | Stock              | 1                                | 4                                | ME         |
| <i>Acinetobacter</i> sp. | Stock              | 1                                | 4                                | ME         |
| <i>Acinetobacter</i> sp. | Stock              | 0.5                              | $>4$                             | ME         |

CAT

| Organism ID               | Challenge or Stock | rBMD MIC ( $\mu\text{g}/\text{mL}$ ) | CAT-1 ( $\mu\text{g}/\text{mL}$ ) | CAT-10 ( $\mu\text{g}/\text{mL}$ ) | Error              |
|---------------------------|--------------------|--------------------------------------|-----------------------------------|------------------------------------|--------------------|
| <i>Acinetobacter</i> sp.  | Stock              | 4                                    | 1                                 | 4                                  | VME CAT-1          |
| <i>Acinetobacter</i> sp.  | Stock              | 8                                    | 1                                 | 1                                  | VME CAT-1 & CAT-10 |
| <i>Acinetobacter</i> sp.. | stock              | 8                                    | $\leq 0.5$                        | 2                                  | VME CAT-1 & CAT-10 |
| <i>Acinetobacter</i> sp.  | Stock              | 8                                    | 1                                 | 2                                  | VME CAT-1 & CAT-10 |
| <i>Acinetobacter</i> sp.  | Stock              | 8                                    | $\leq 0.5$                        | 1                                  | VME CAT-1 & CAT-10 |
| <i>Acinetobacter</i> sp.  | Stock              | 16                                   | 1                                 | skip                               | VME CAT-1          |
| <i>Acinetobacter</i> sp.  | Stock              | 16                                   | 1                                 | 2                                  | VME CAT-1 & CAT-10 |
| <i>Acinetobacter</i> sp.  | stock              | 16                                   | $\leq 0.5$                        | $\leq 0.5$                         | VME CAT-1 & CAT-10 |

|                                     |           |     |      |    |                   |
|-------------------------------------|-----------|-----|------|----|-------------------|
| <i>Acinetobacter</i> sp.            | stock     | 16  | ≤0.5 | 1  | VME CAT-1 &CAT-10 |
| <i>Acinetobacter</i> sp.            | Challenge | 16  | 1    | 1  | VME CAT-1 &CAT-10 |
| <i>Acinetobacter</i> sp.            | Challenge | 16  | 1    | 1  | VME CAT-1 &CAT-10 |
| <i>Acinetobacter</i> sp.            | Challenge | >16 | 2    | >4 | VME CAT-1         |
| <i>Acinetobacter</i> sp.            | Challenge | >16 | 1    | >4 | VME CAT-1         |
| <i>Acinetobacter</i> sp.            | Challenge | >16 | 1    | >4 | VME CAT-1         |
| <i>Acinetobacter</i> sp.            | Challenge | >16 | 2    | >4 | VME CAT-1         |
| <i>Enterobacter cloacae</i> complex | stock     | >16 | ≤0.5 | >4 | VME CAT-1         |
| <i>Enterobacter</i> sp.             | Stock     | 4   | ≤0.5 | 2  | VME CAT-1 &CAT-10 |
| <i>Escherichia coli</i>             | stock     | 8   | 2    | 4  | VME CAT-1 &CAT-10 |
| <i>Klebsiella</i> sp.               | Stock     | 4   | 1    | 4  | VME CAT-1         |
| <i>Pseudomonas aeruginosa</i>       | Challenge | 4   | ≤0.5 | >4 | VME CAT-1         |
